# Supplementary material for: Recommended coupling to global meteorological fields for long-term tracer simulations with WRF-GHG
Source: Copernicus journal article supplement (doi:10.5194/egusphere-2023-2839), 2024-02-12
Supplement: Supplementary file 1 [file egusphere-2023-2839-supplement.pdf]

# FDLR in-situ / 20180529a / WRF-GHG

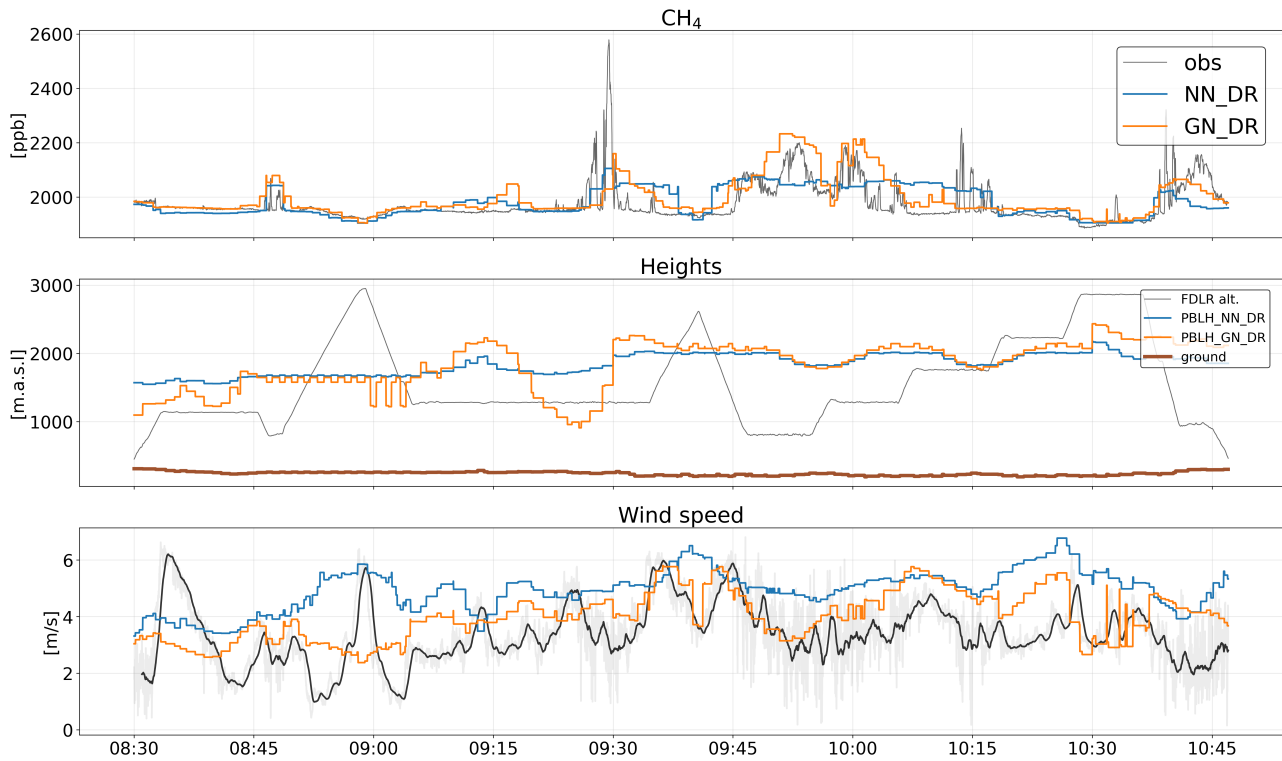

**Figure S1.** Overview time series, showing modeled and observed CH<sub>4</sub> (top), altitude of the aircraft, model-simulated PBLH (middle), and wind speeds (bottom) for flightcode 20180529a

## FDLR in-situ / 20180601a / WRF-GHG

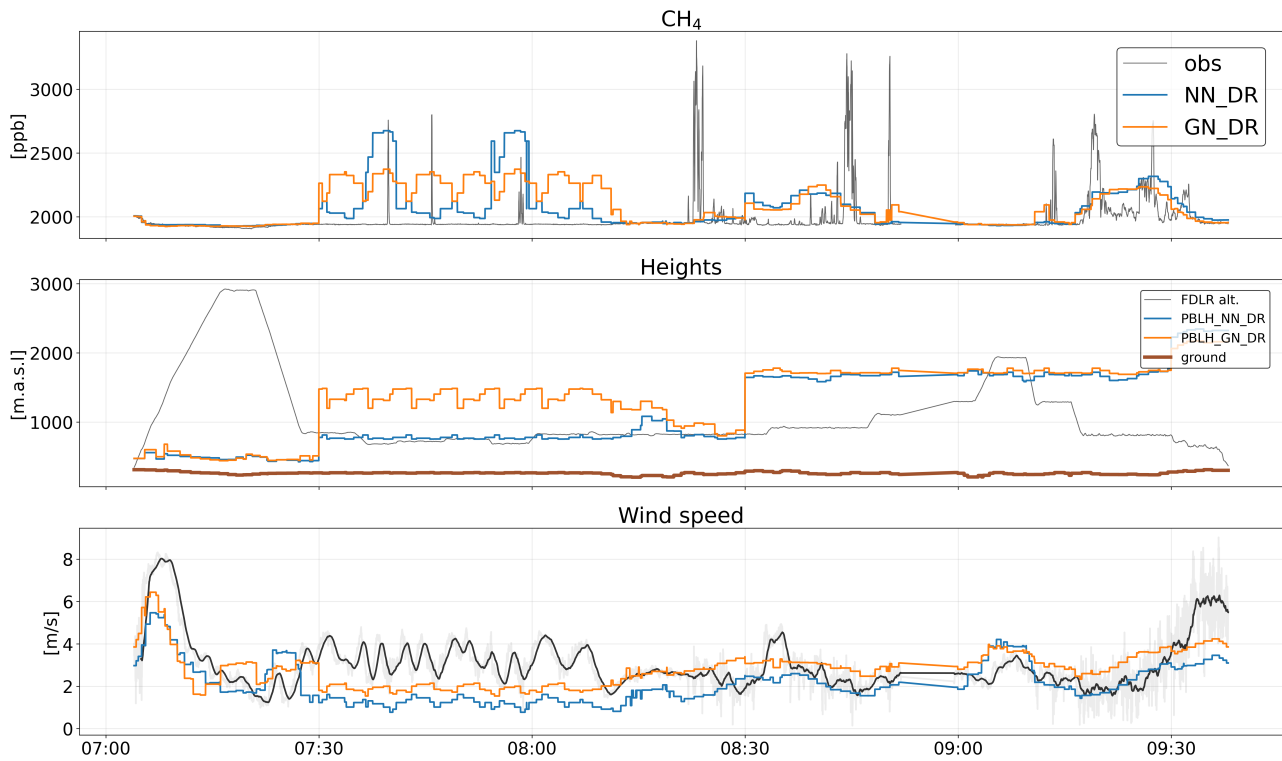

**Figure S2.** Same as Fig. S1 but for flightcode 20180601a

### FDLR in-situ / 20180605a / WRF-GHG

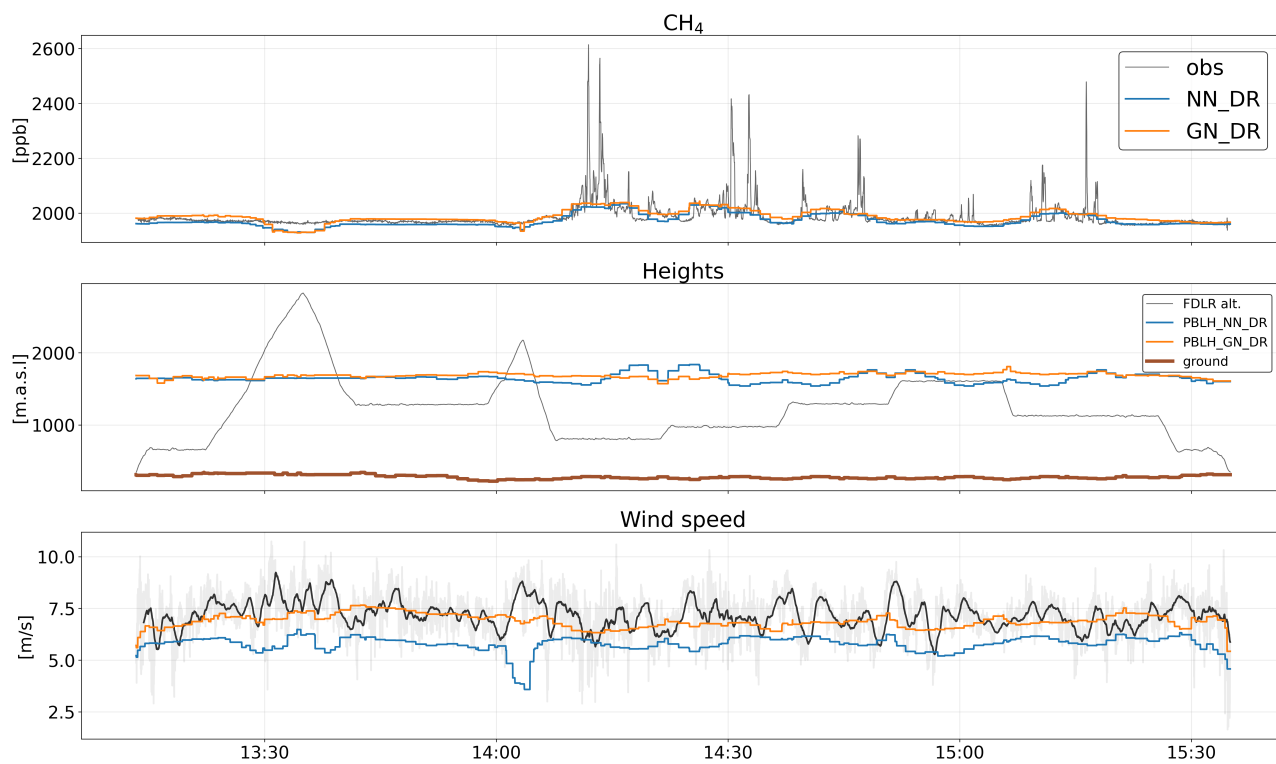

**Figure S3.** Same as Fig. S1 but for flightcode 20180605a

### FDLR in-situ / 20180606a / WRF-GHG

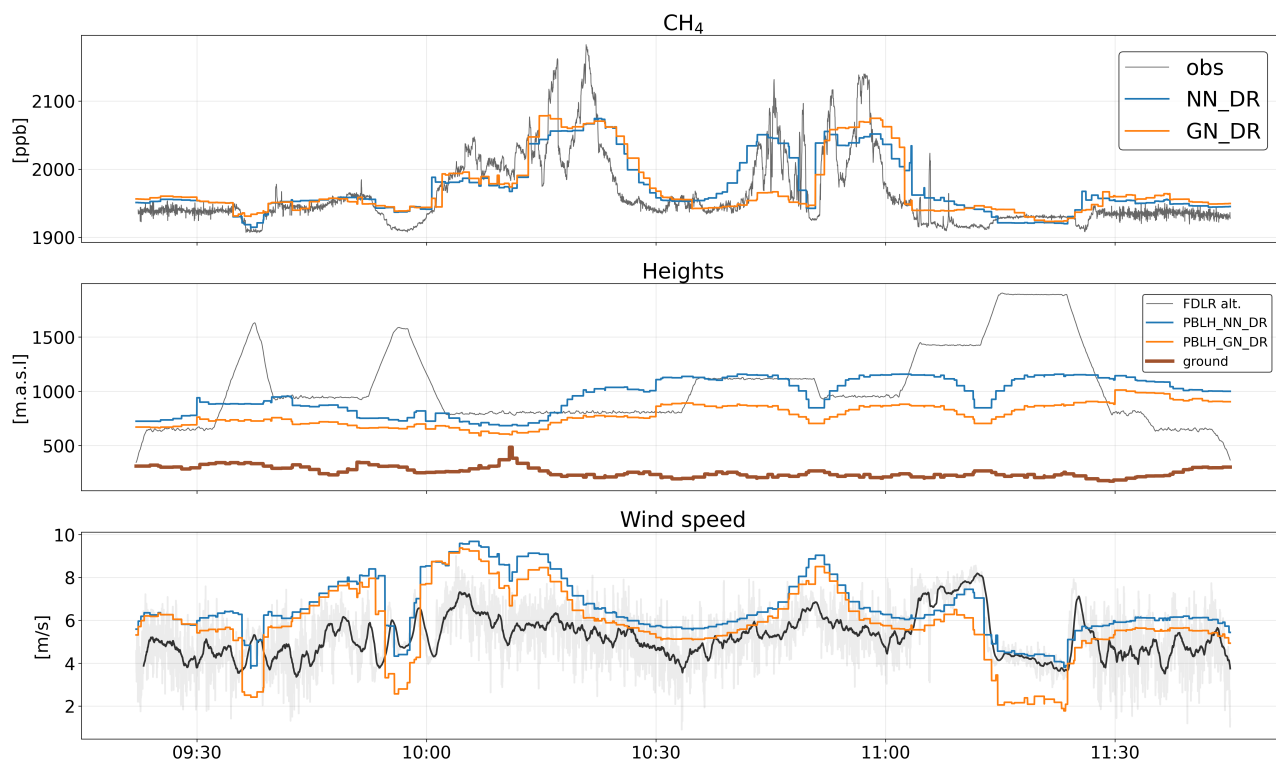

**Figure S4.** Same as Fig. S1 but for flightcode 20180606a

# FDLR in-situ / 20180606b / WRF-GHG

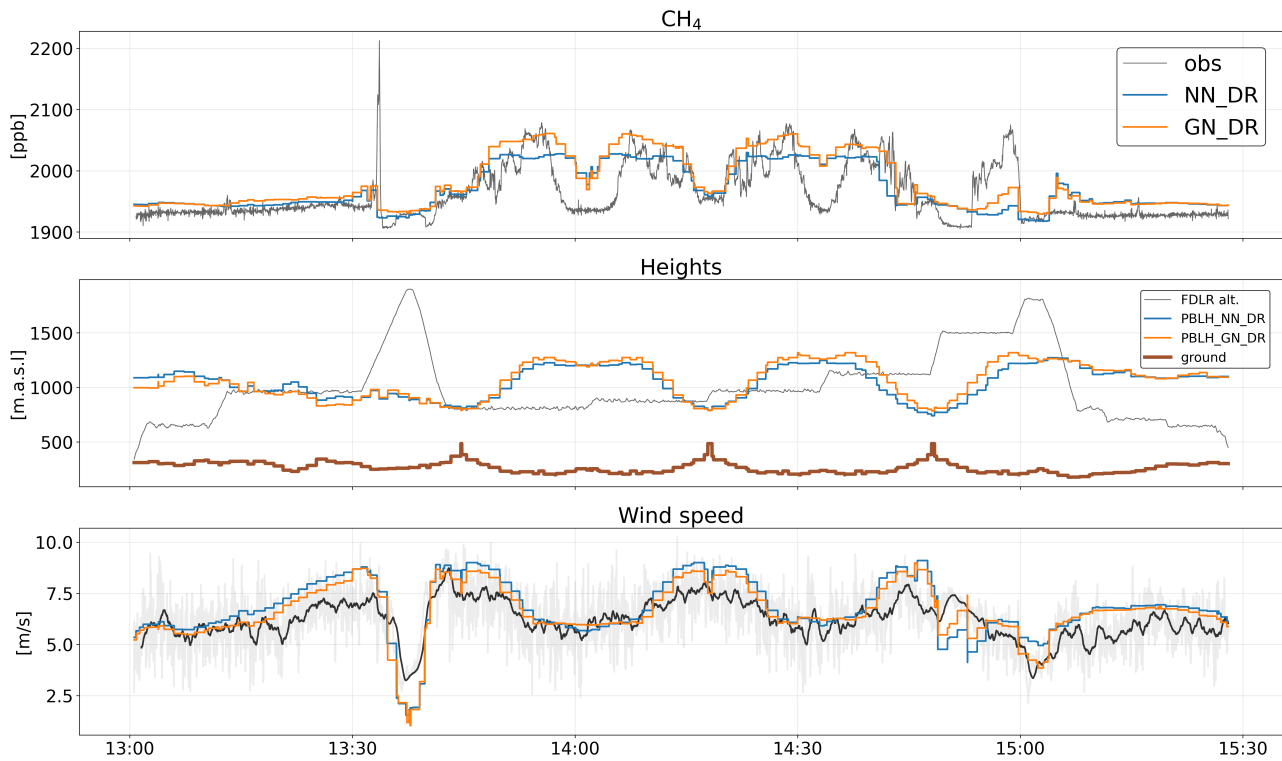

Figure S5. Same as Fig. S1 but for flightcode 20180606b

# FDLR in-situ / 20180607a / WRF-GHG

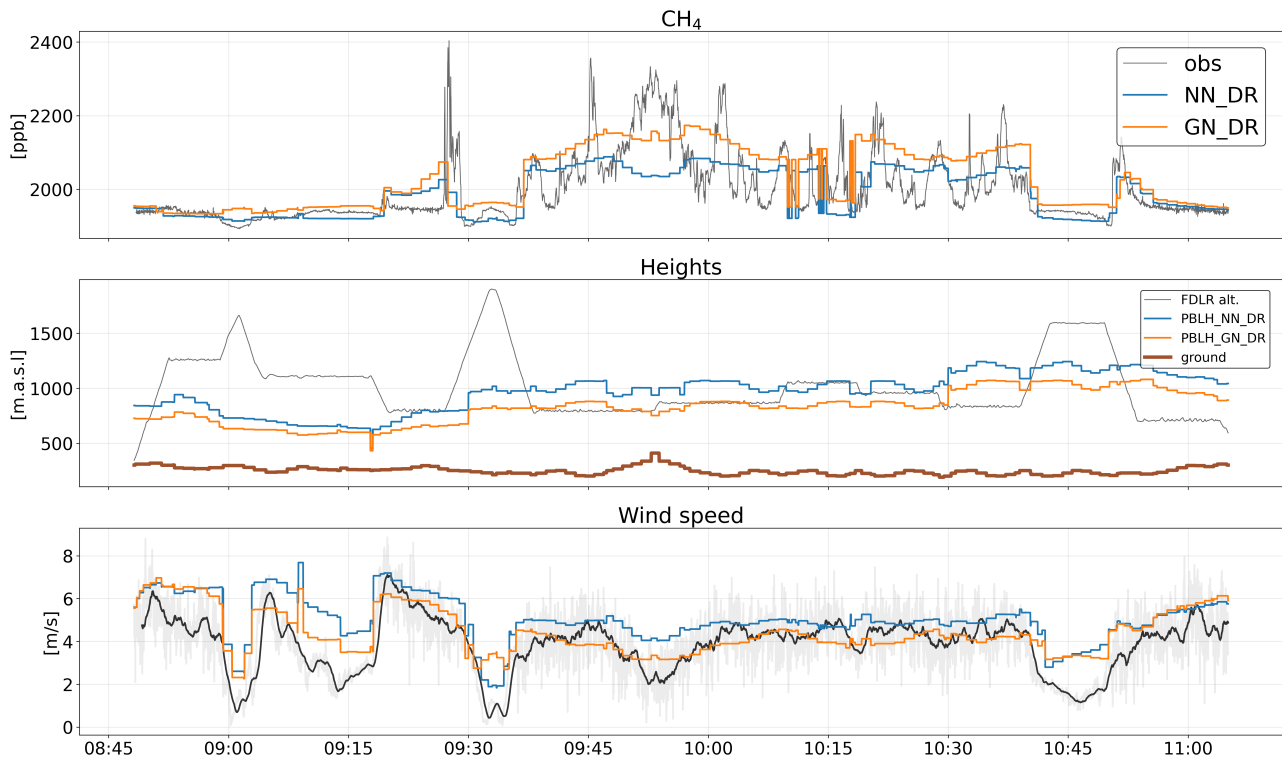

Figure S6. Same as Fig. S1 but for flightcode 20180607a

### FDLR in-situ / 20180607b / WRF-GHG

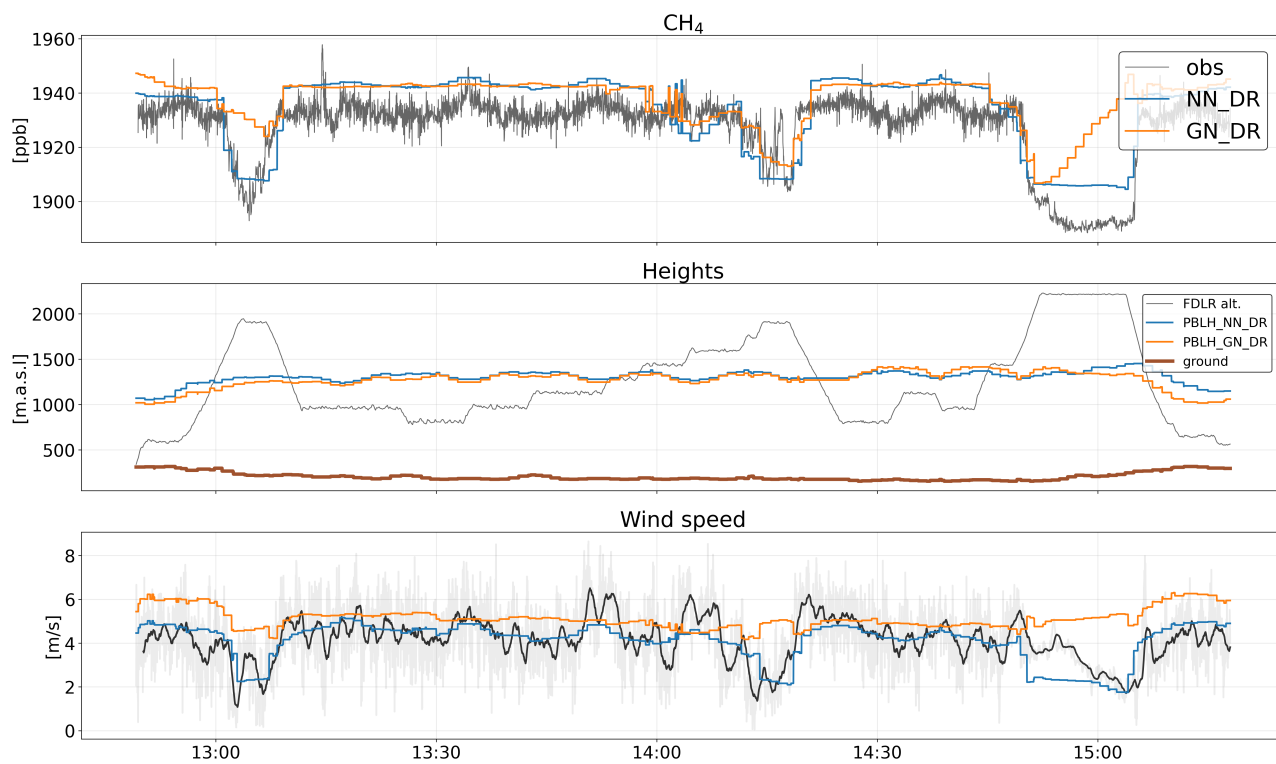

**Figure S7.** Same as Fig. S1 but for flightcode 20180607b

# FDLR in-situ / 20180609a / WRF-GHG

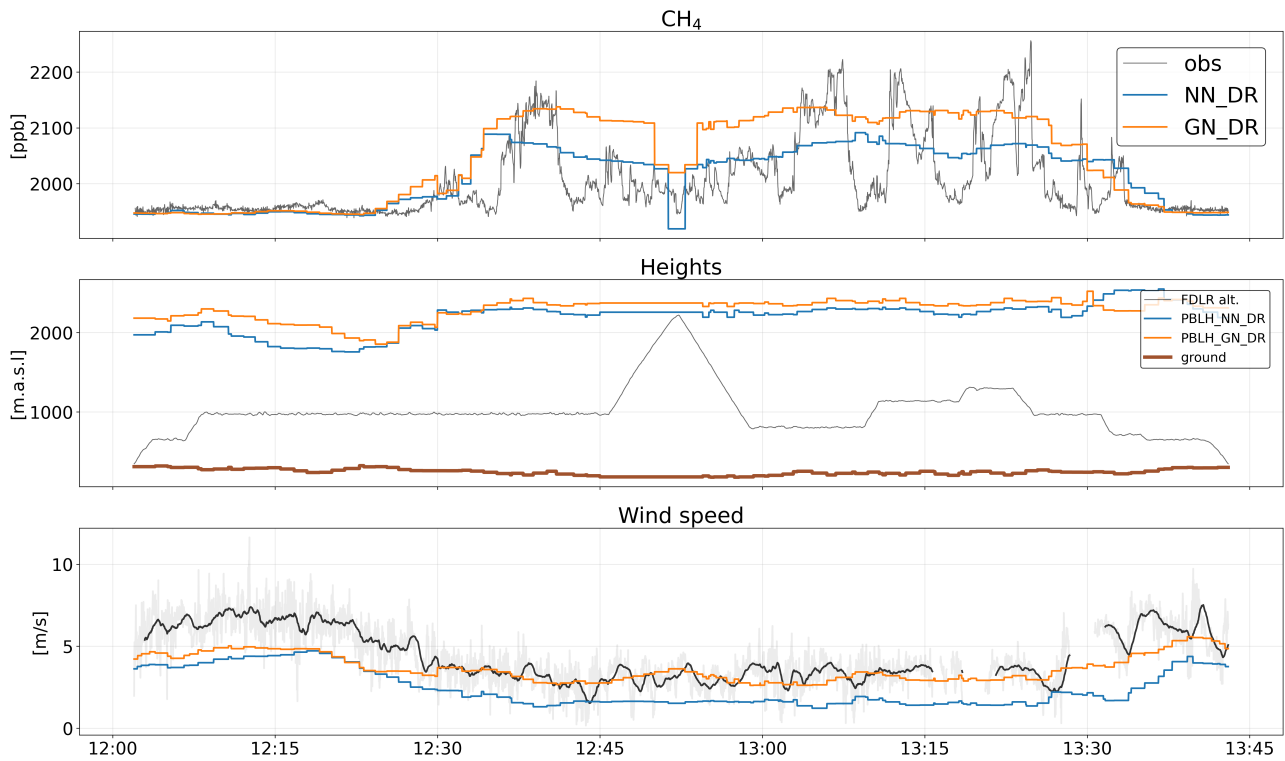

**Figure S8.** Same as Fig. S1 but for flightcode 20180609a



# FDLR in-situ / 20180611a / WRF-GHG

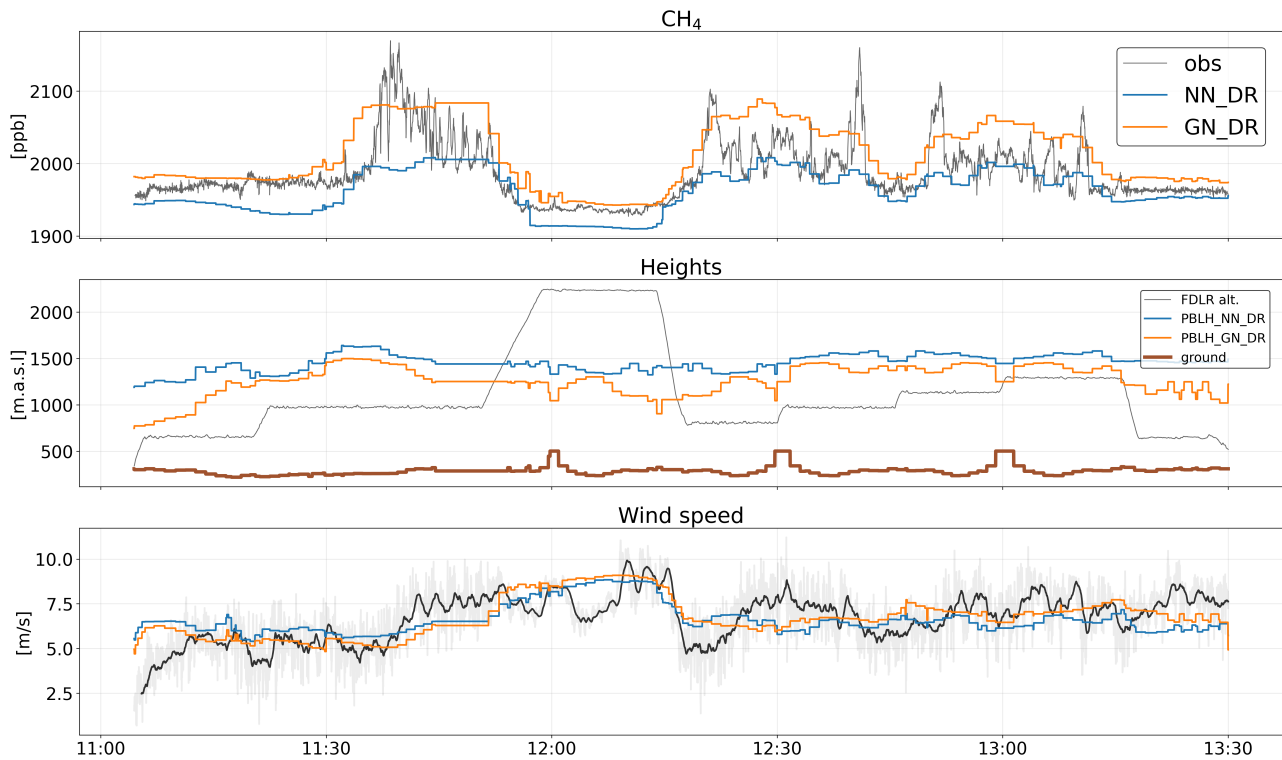

**Figure S9.** Same as Fig. S1 but for flightcode 20180611a

## FDLR in-situ / 20180613a / WRF-GHG

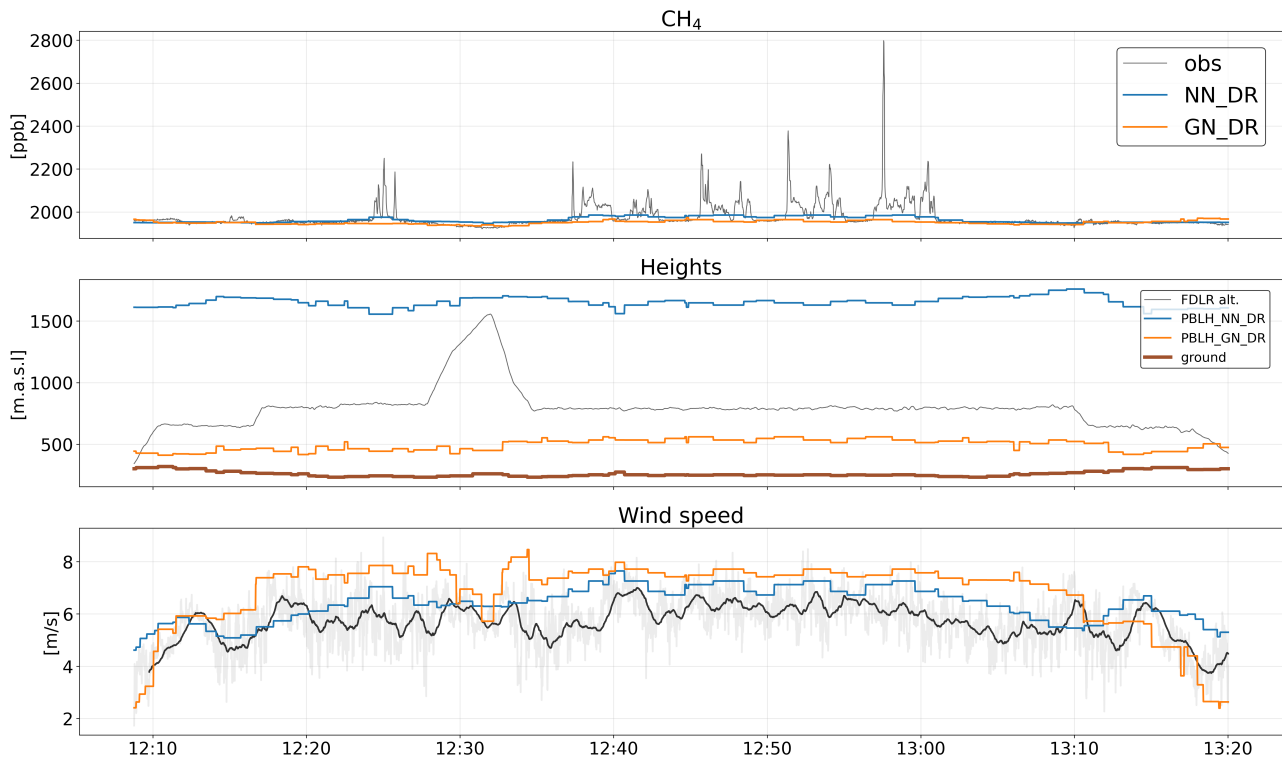

Figure S10. Same as Fig. S1 but for flightcode 20180613a

# FDLR in-situ / 20180614a / WRF-GHG

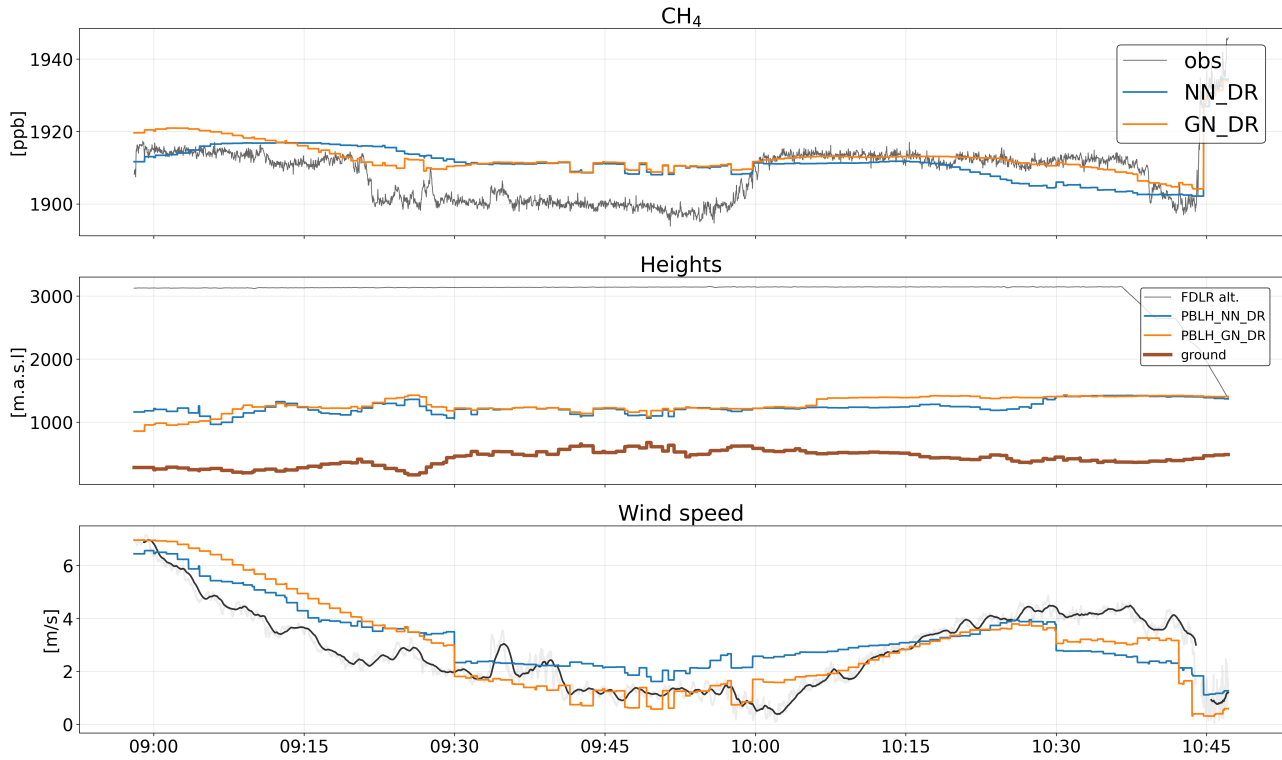

**Figure S11.** Same as Fig. S1 but for flightcode 20180614a

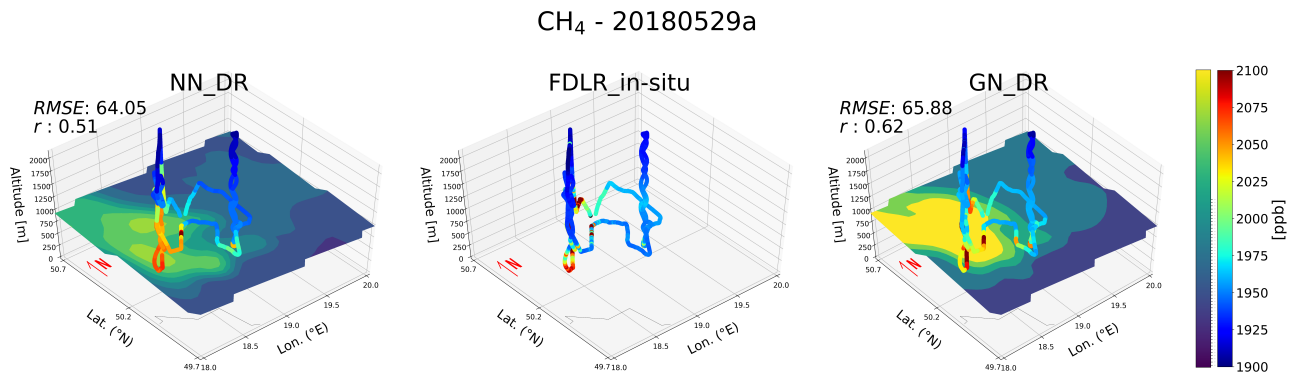

**Figure S12.** Flight tracks of the airborne platform coloured based on either modelled  $\text{CH}_4$  mole fractions (left: NN\_DR; right: GN\_DR) or in situ aircraft measurements (middle) performed over the Upper Silesian Coal Basin. In situ observation have a high temporal resolution of 1 s spanning about 2.5 hours (ca. 9000 time steps), the models fields were stored hourly. Modeled values were extracted along the flight track from the nearest point in time and space. 2-D planes of the modeled  $\text{CH}_4$  at a model level ca. 950 m.a.s.l. are also plotted to give an indication of the plume structure and the location of the point source.

### CH<sub>4</sub> - 20180601a

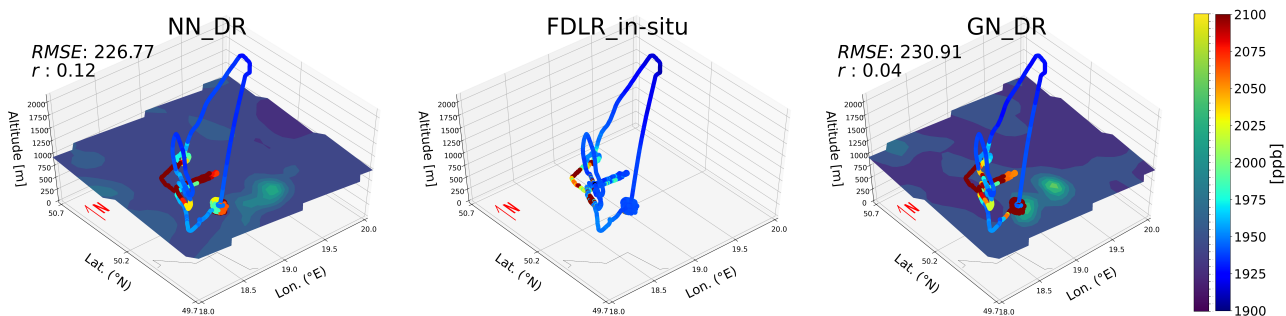

**Figure S13.** Same as Fig. S12 but for flightcode 20180601a. The main target was Pniówek Center shaft. The aircraft was spiraling around the point source, the horizontal distance from the source to the spiral loop for both flights were < 5 km.

### CH<sub>4</sub> - 20180605a

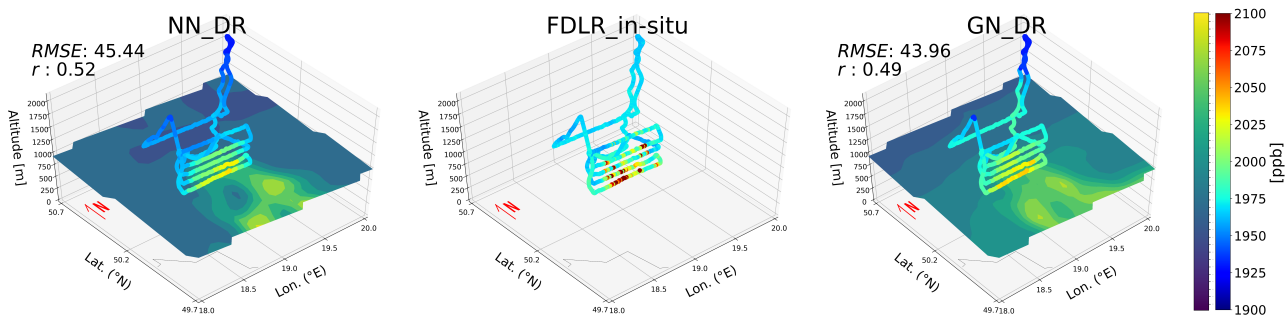

**Figure S14.** Same as Fig. S12 but for flightcode 20180605a

### CH<sub>4</sub> - 20180606a

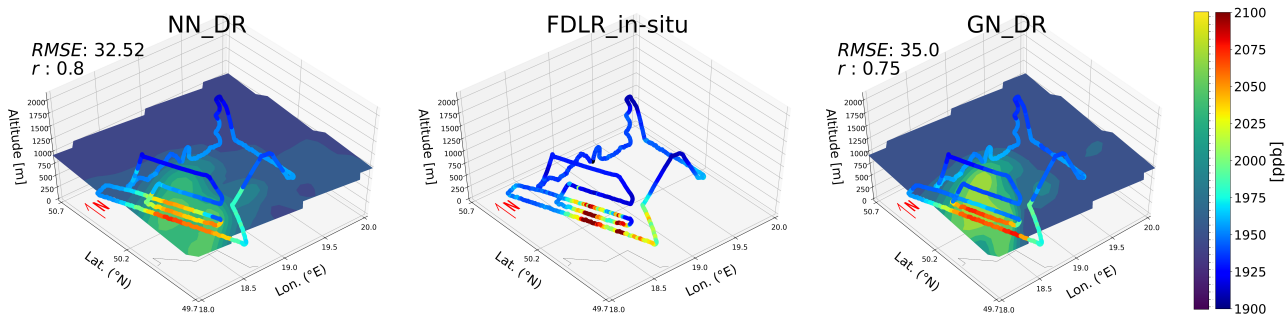

**Figure S15.** Same as Fig. S12 but for flightcode 20180606a

### CH<sub>4</sub> - 20180606b

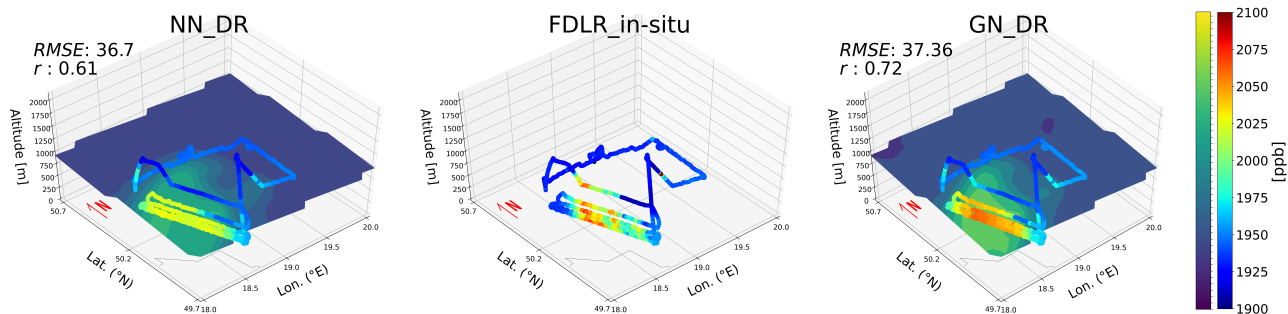

**Figure S16.** Same as Fig. S12 but for flightcode 20180606b

### CH<sub>4</sub> - 20180607a

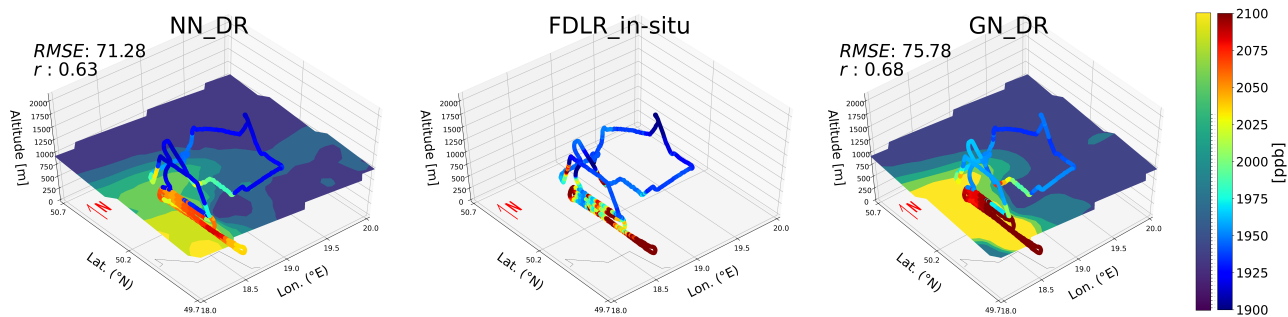

**Figure S17.** Same as Fig. S12 but for flightcode 20180607a

### CH<sub>4</sub> - 20180607b

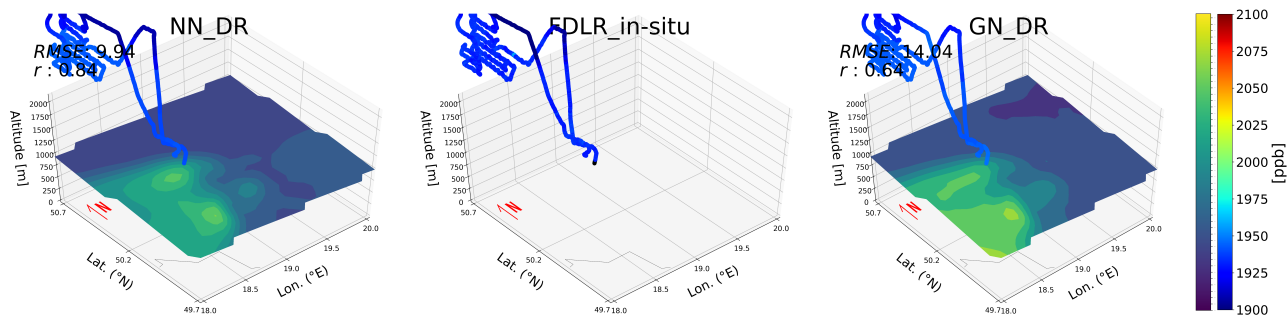

**Figure S18.** Same as Fig. S12 but for flightcode 20180607b. It was a flight targeted to the Bełchatów power plant (approximately 80 km north away from USCB).

### CH<sub>4</sub> - 20180609a

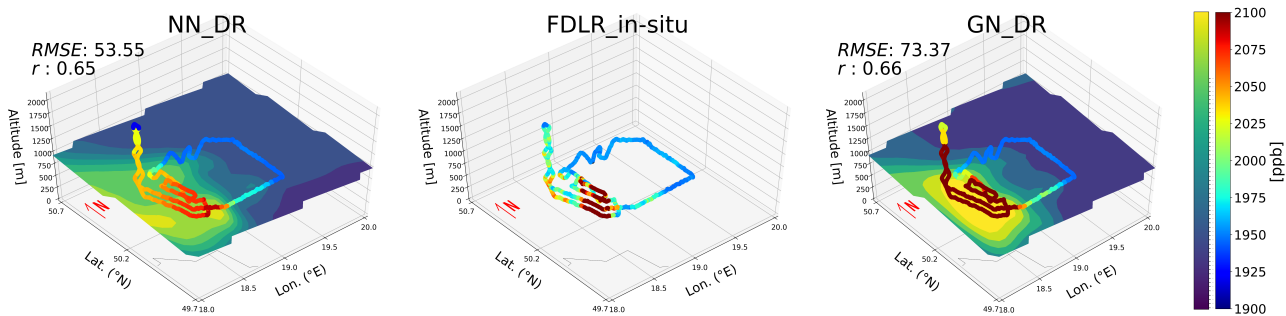

**Figure S19.** Same as Fig. S12 but for flightcode 20180609a

### CH<sub>4</sub> - 20180611a

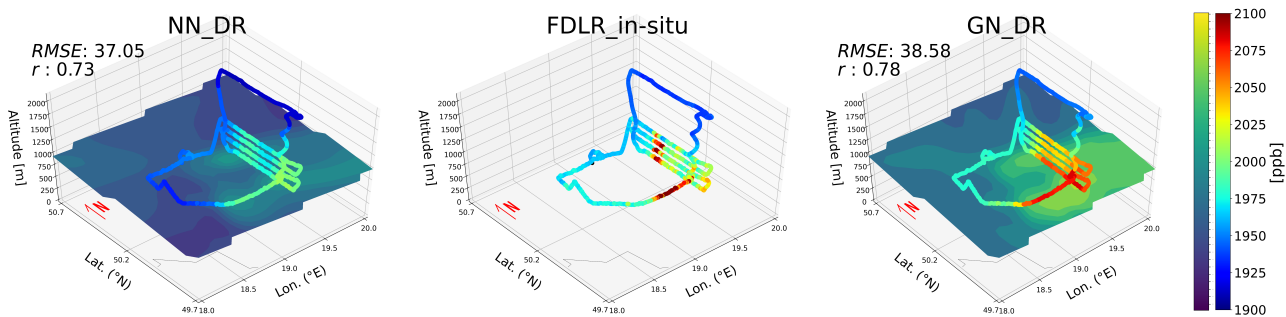

**Figure S20.** Same as Fig. S12 but for flightcode 20180611a

### CH<sub>4</sub> - 20180613a

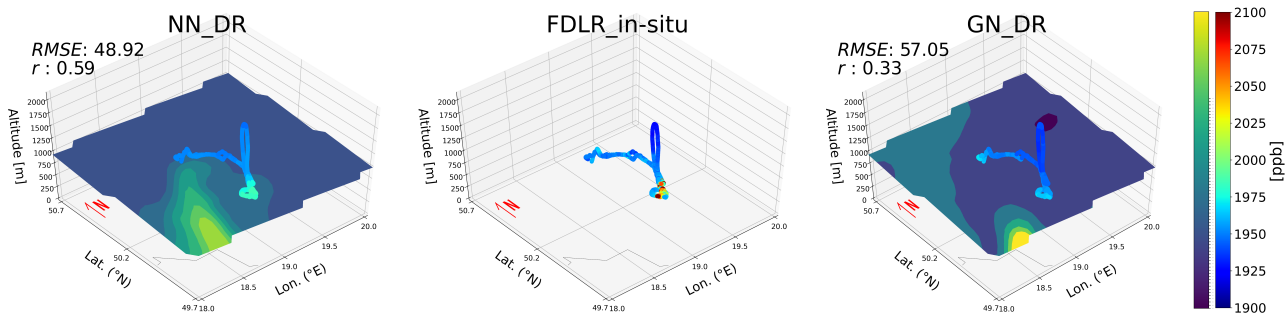

**Figure S21.** Same as Fig. S12 but for flightcode 20180613a. The main target was shaft Silesia V. The aircraft was spiraling around the point source, the horizontal distance from the source to the spiral loop for both flights were < 5 km.

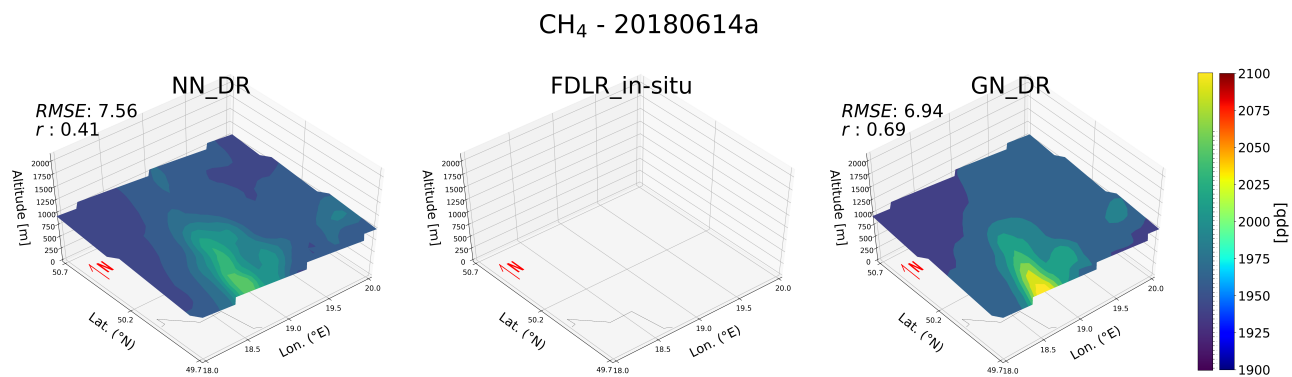

**Figure S22.** Same as Fig. S12 but for flightcode 20180614a; it was a transfer flight back to Munich (most measurements are above the PBL, 3000 m.a.s.).

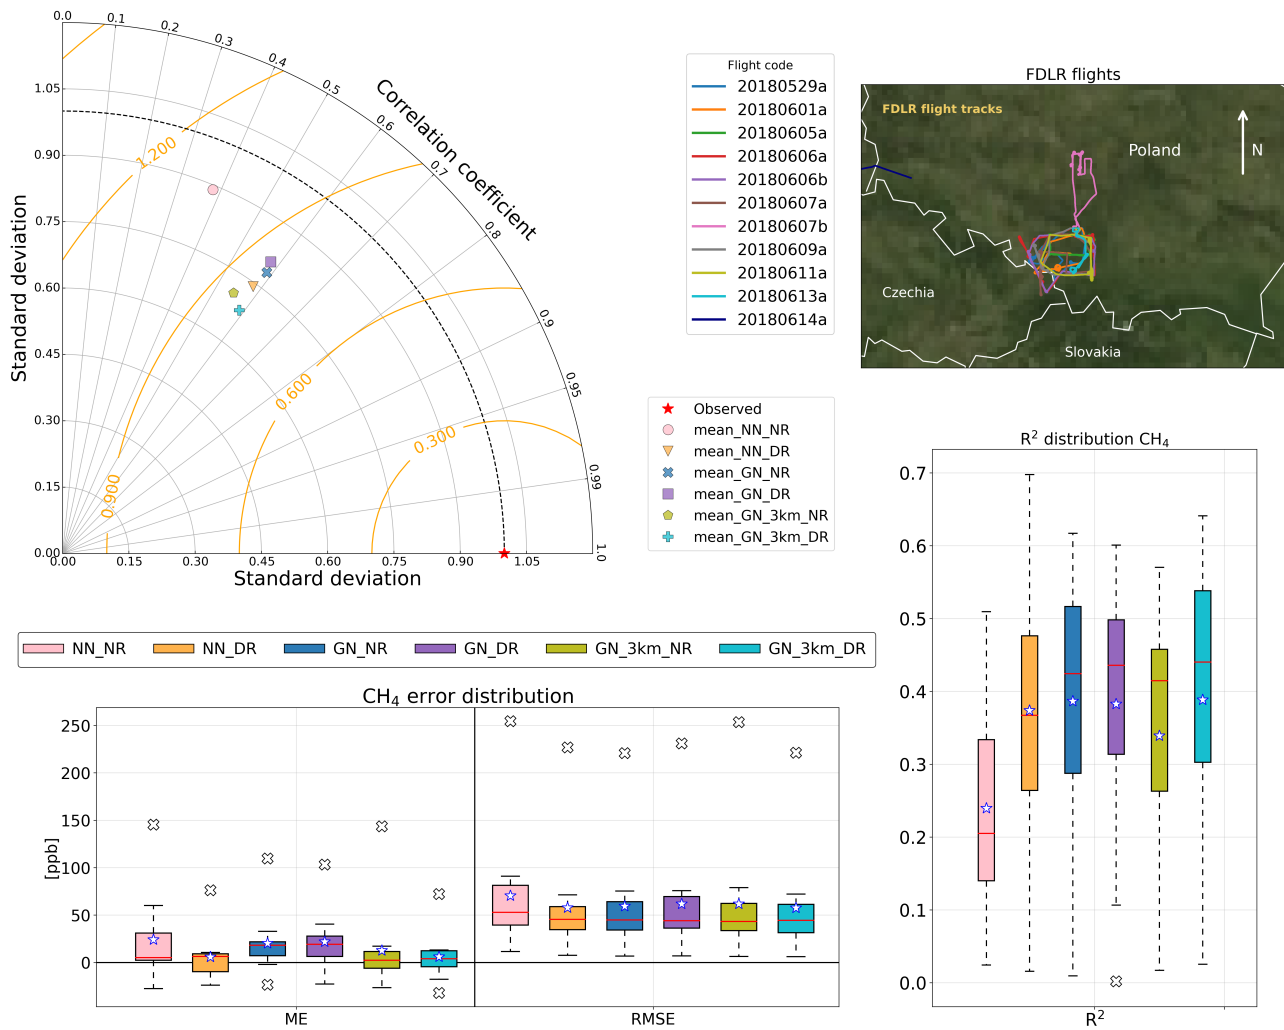

Figure S23. Statistical overview of all flights



## CH<sub>4</sub> @Munich (48.08, 11.28)

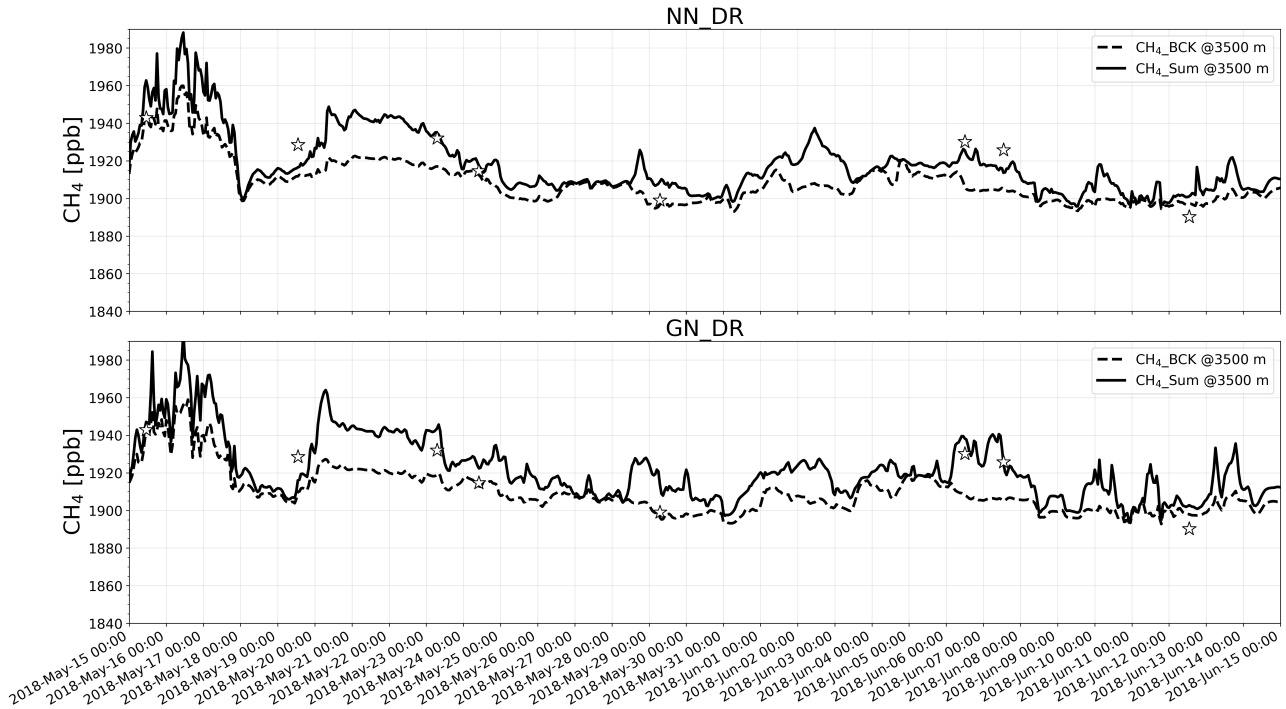

**Figure S24.** CH<sub>4</sub> (top: NN\_DR; bottom: GN\_DR) over time at Munich (48.08 °N, 11.28 °E) in mole fraction (ppb). Background methane as CH<sub>4</sub>\_BCK (dashed lines) and total methane as CH<sub>4</sub>\_Sum, i.e. the sum of background and anthropogenic CH<sub>4</sub> (solid lines) at 3500 m.a.s.l. The white stars show coincident aircraft-based in situ measurements in the free troposphere.

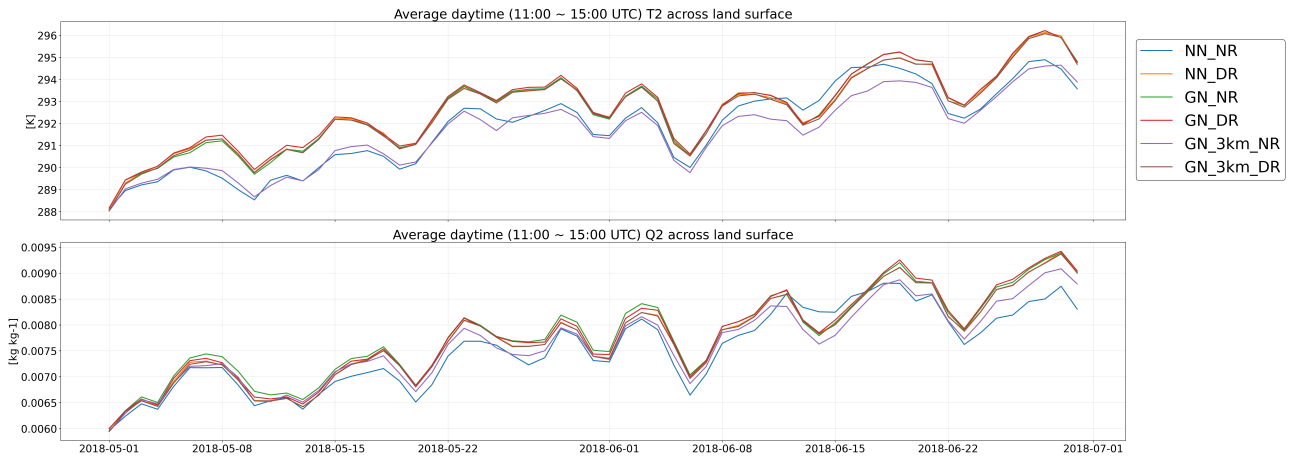

**Figure S25.** Average daytime (11:00 - 15:00 UTC) Q2 (top) and T2 (bottom) over land within the model domain for different model scenarios between May 1 - June 31, 2018.

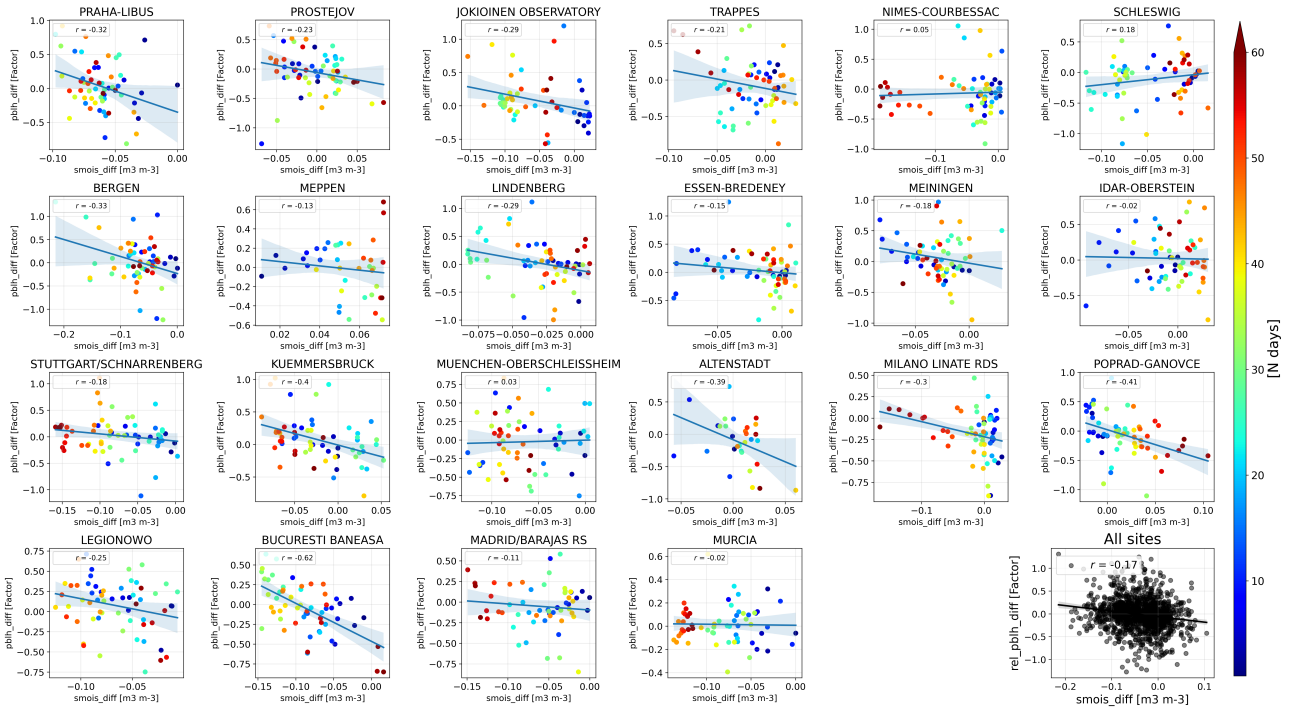

**Figure S26.** Scatter plot showing the correlation of the difference in SMOIS against the relative difference in PBLH between simulation GN\_DR and NN\_NR at 22 different locations. The colors mark the day after 1 May (61 days in total up to 1 July) from blue to red. The plot in the lower right corner contains the data collected from all 22 sites.

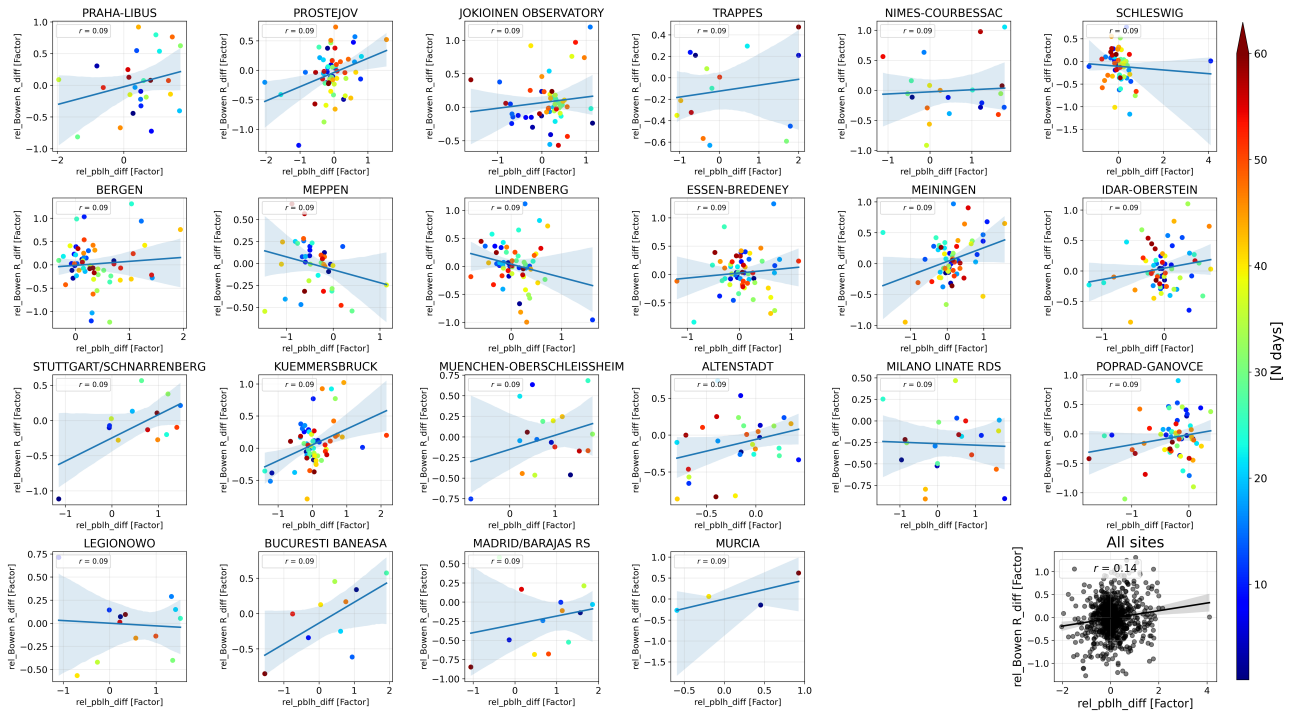

**Figure S27.** Scatter plot showing the correlation of the relative difference in PBLH against the relative difference in Bowen Ratio between simulation GN\_DR and NN\_NR at 22 different locations. The colors mark the day after 1 May (61 days in total up to 1 July) from blue to red. The plot in the lower right corner contains the data collected from all 22 sites.

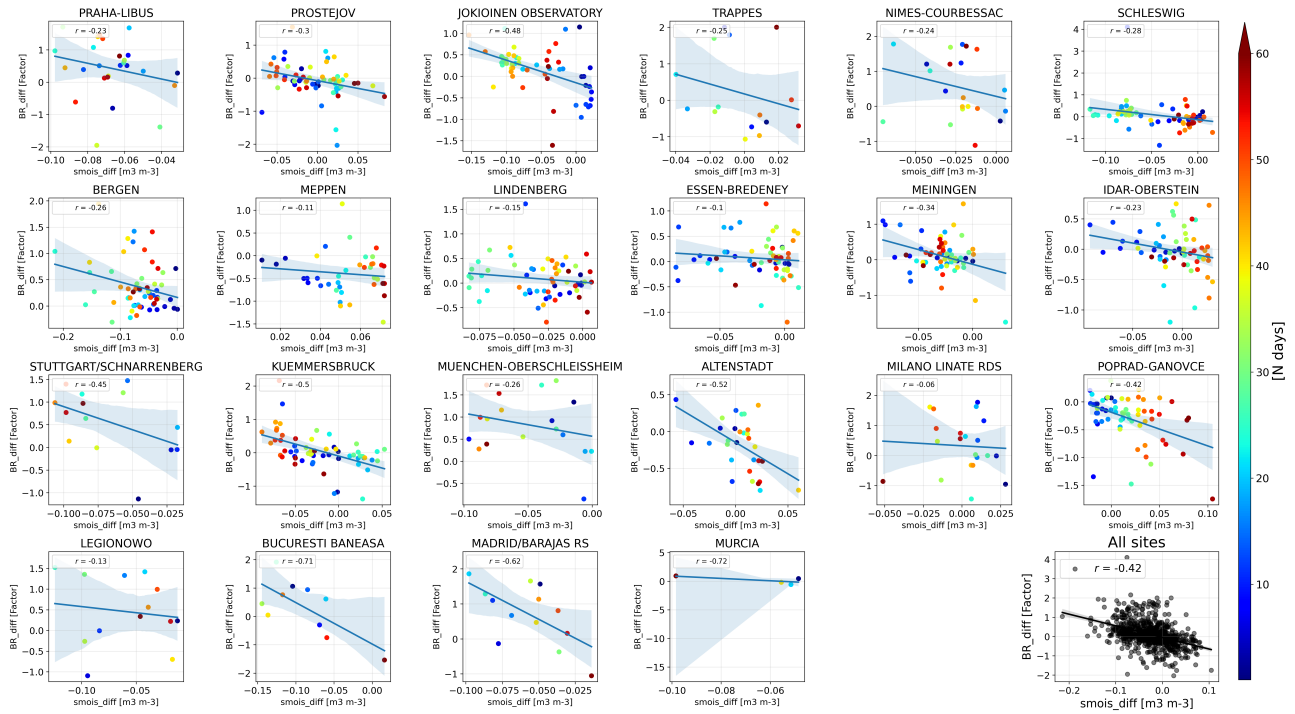

**Figure S28.** Scatter plot showing the correlation of the difference in SMOIS against the relative difference in Bowen ratio (BR) between simulation GN\_DR and NN\_NR at 22 different locations. The colors mark the day after 1 May (61 days in total up to 1 July) from blue to red. The plot in the lower right corner contains the data collected from all 22 sites.

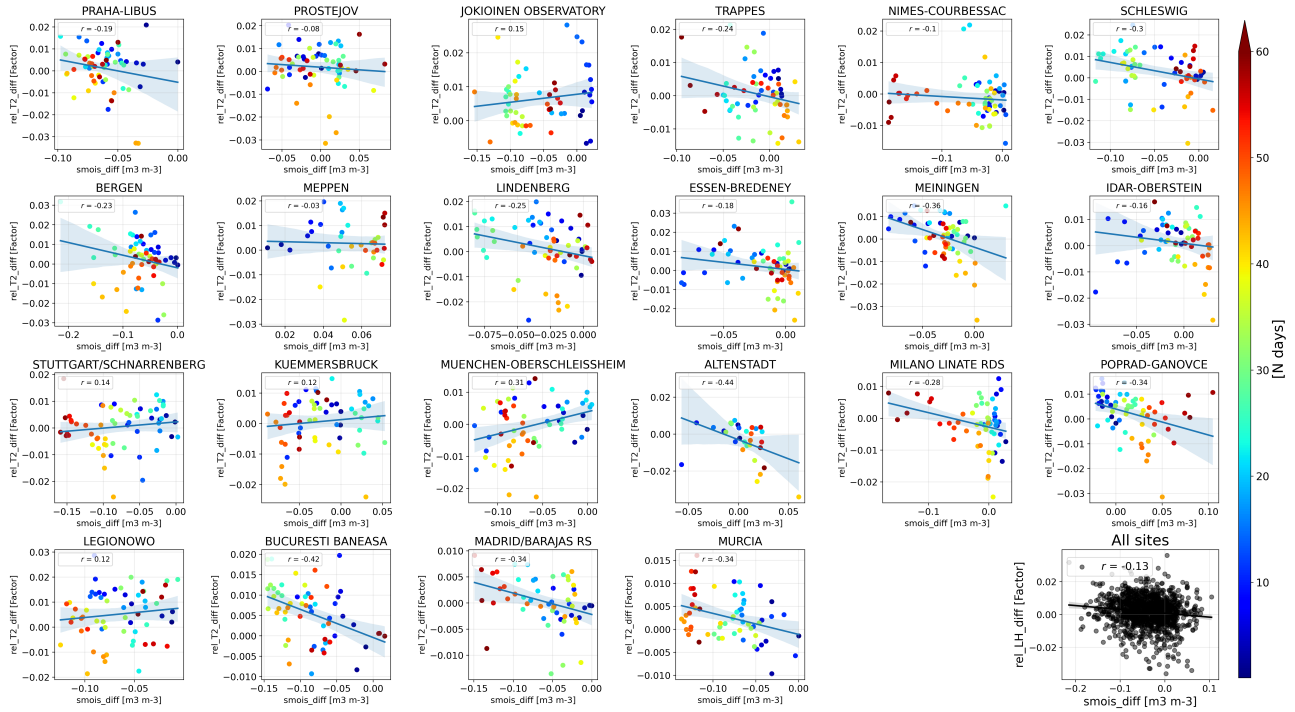

**Figure S29.** Scatter plot showing the correlation of the difference in SMOIS against the relative difference in T2 between simulation GN\_DR and NN\_NR at 22 different locations. The colors mark the day after 1 May (61 days in total up to 1 July) from blue to red. The plot in the lower right corner contains the data collected from all 22 sites.

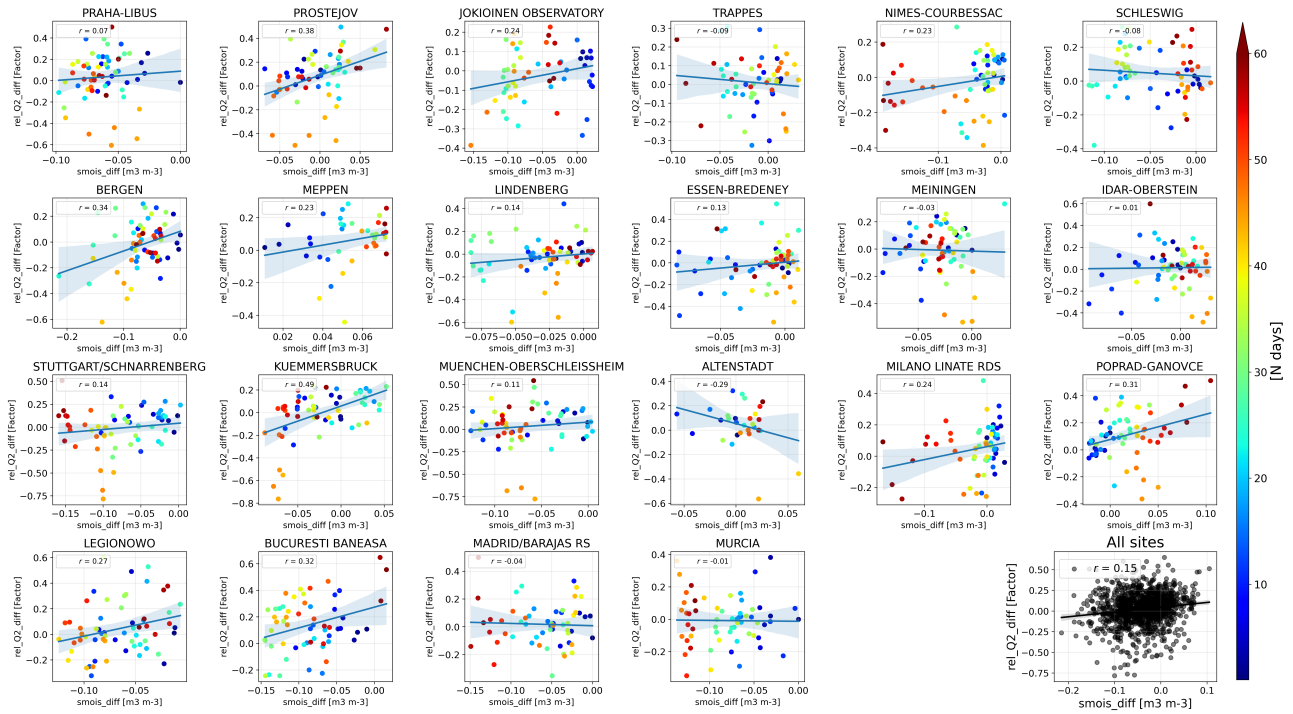

**Figure S30.** Scatter plot showing the correlation of the difference in SMOIS against the relative difference in Q2 between simulation GN\_DR and NN\_NR at 22 different locations. The colors mark the day after 1 May (61 days in total up to 1 July) from blue to red. The plot in the lower right corner contains the data collected from all 22 sites.

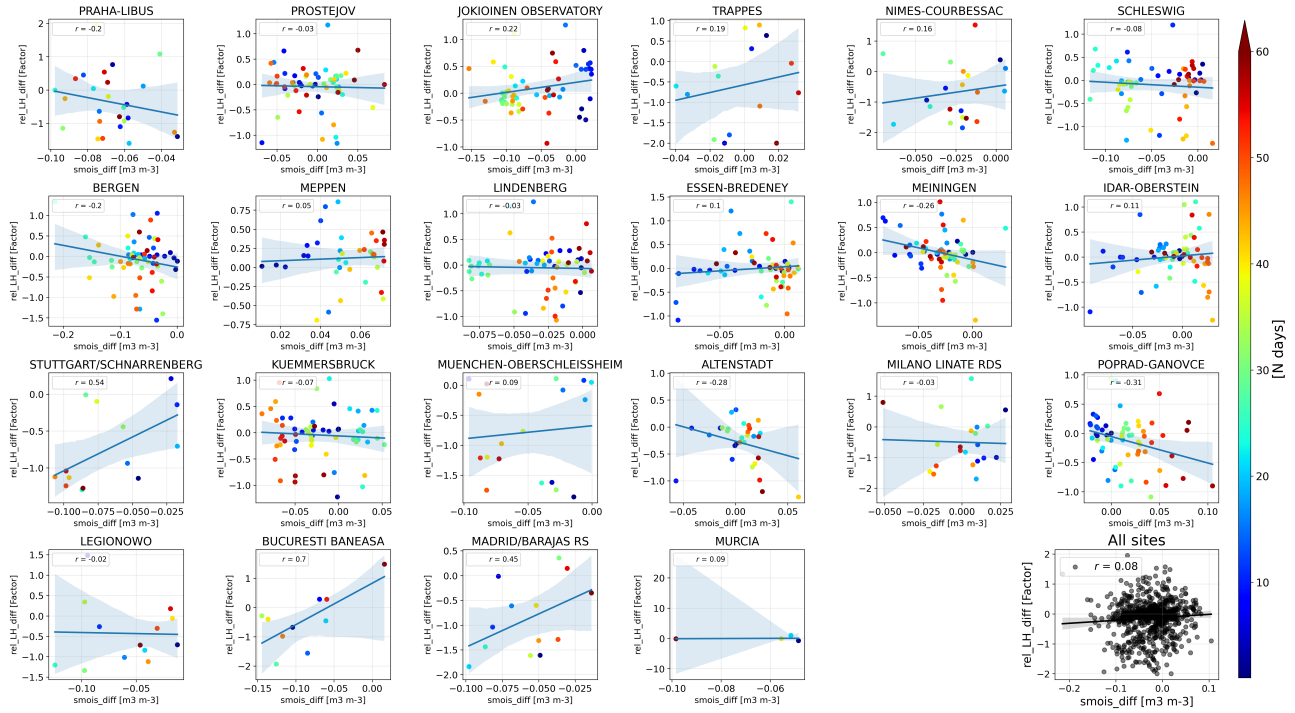

**Figure S31.** Scatter plot showing the correlation of the difference in SMOIS against the relative difference in Latent heat flux (LH) between simulation GN\_DR and NN\_NR at 22 different locations. The colors mark the day after 1 May (61 days in total up to 1 July) from blue to red. The plot in the lower right corner contains the data collected from all 22 sites. Note that due to the need to calculate the Bowen ratio (LH in the denominator), data points that lead the Bowen ratio to be N/A are removed.

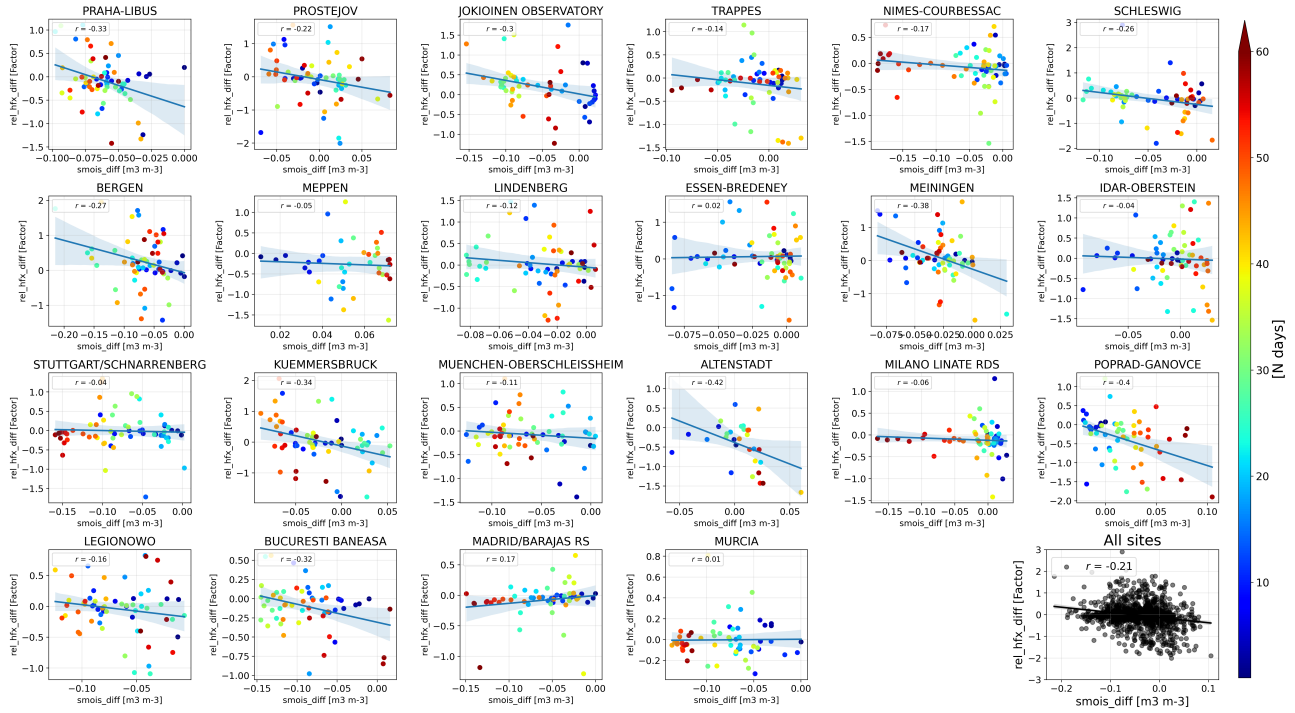

**Figure S32.** Scatter plot showing the correlation of the difference in SMOIS against the relative difference in Sensible heat flux (HFX) between simulation GN\_DR and NN\_NR at 22 different locations. The colors mark the day after 1 May (61 days in total up to 1 July) from blue to red. The plot in the lower right corner contains the data collected from all 22 sites. Note that due to the need to calculate the Bowen ratio (LH in the denominator), data points that lead the Bowen ratio to be N/A are removed.



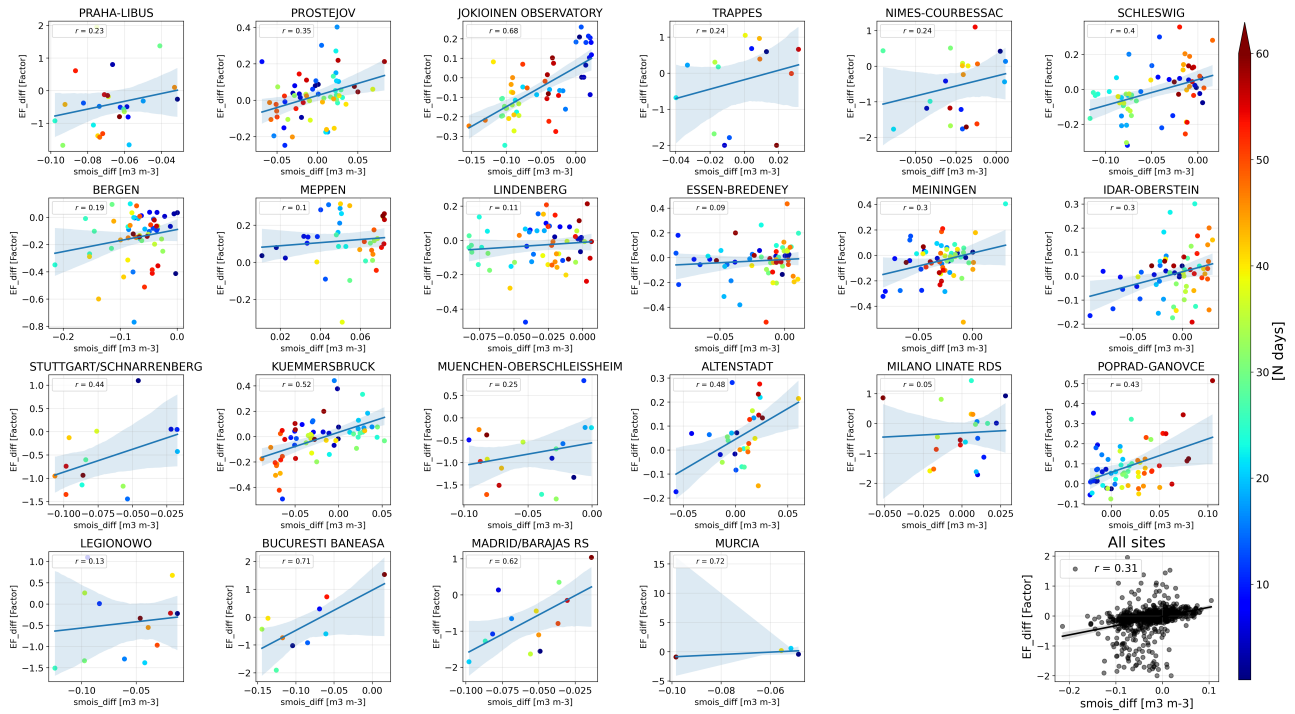

**Figure S33.** Scatter plot showing the correlation of the difference in SMOIS against the relative difference in Evaporative Fraction (EF) between simulation GN\_DR and NN\_NR at 22 different locations. The colors mark the day after 1 May (61 days in total up to 1 July) from blue to red. The plot in the lower right corner contains the data collected from all 22 sites.
